# Supplementary material for: Homozygous SGCB splice-site variant causes isolated dilated cardiomyopathy through sarcoglycan complex destabilization in East Asians
Source: JCI journal article supplement (doi:10.1172/jci198675), 2026-06-01

Full unedited blot gel for Figure [3B]

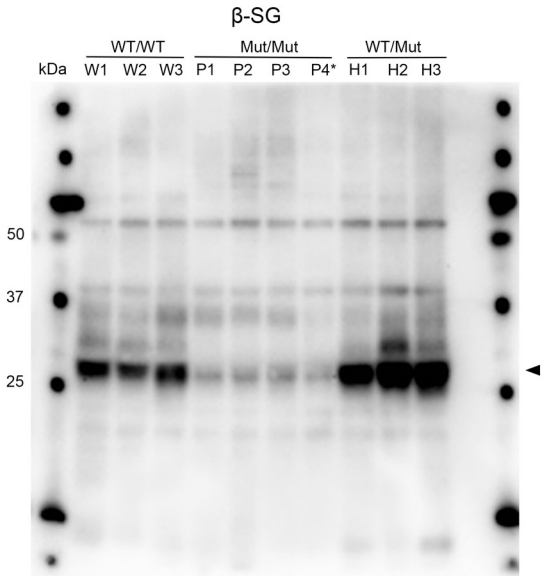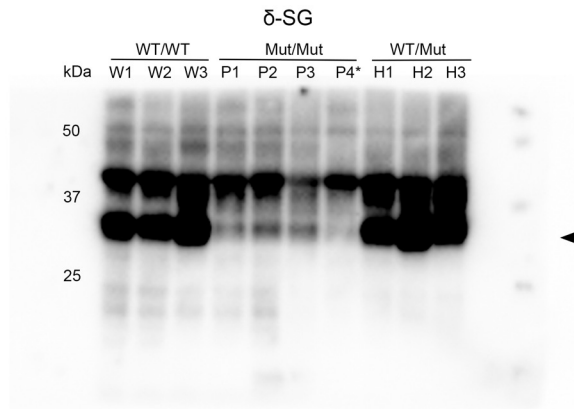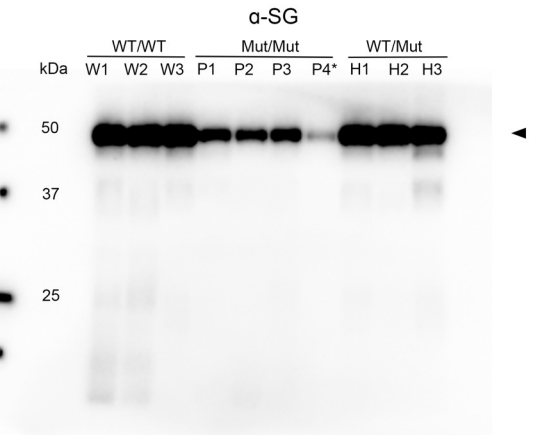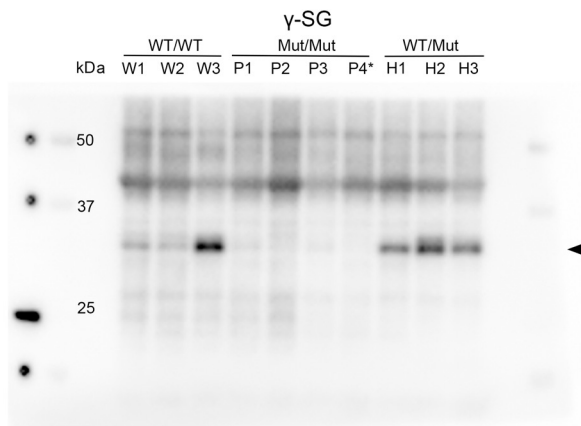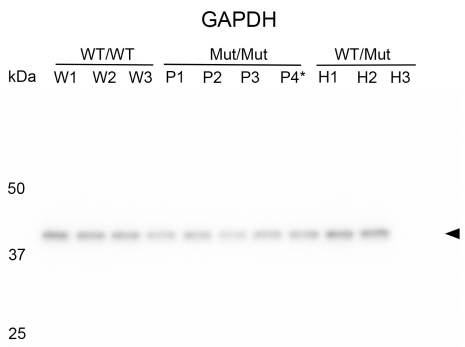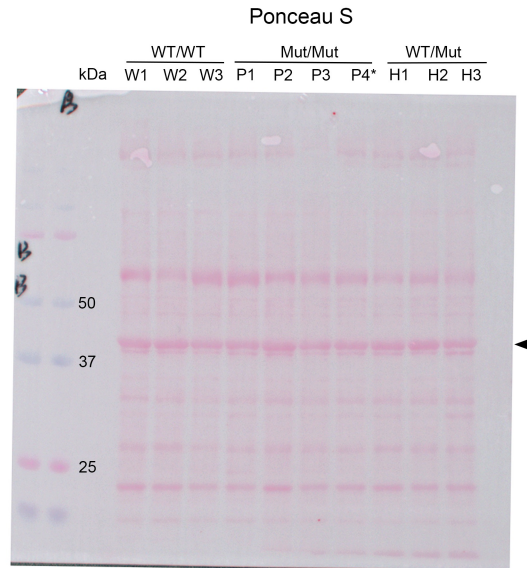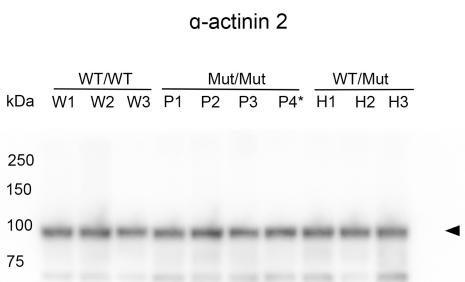

Full unedited blot gel for Figure [6B]

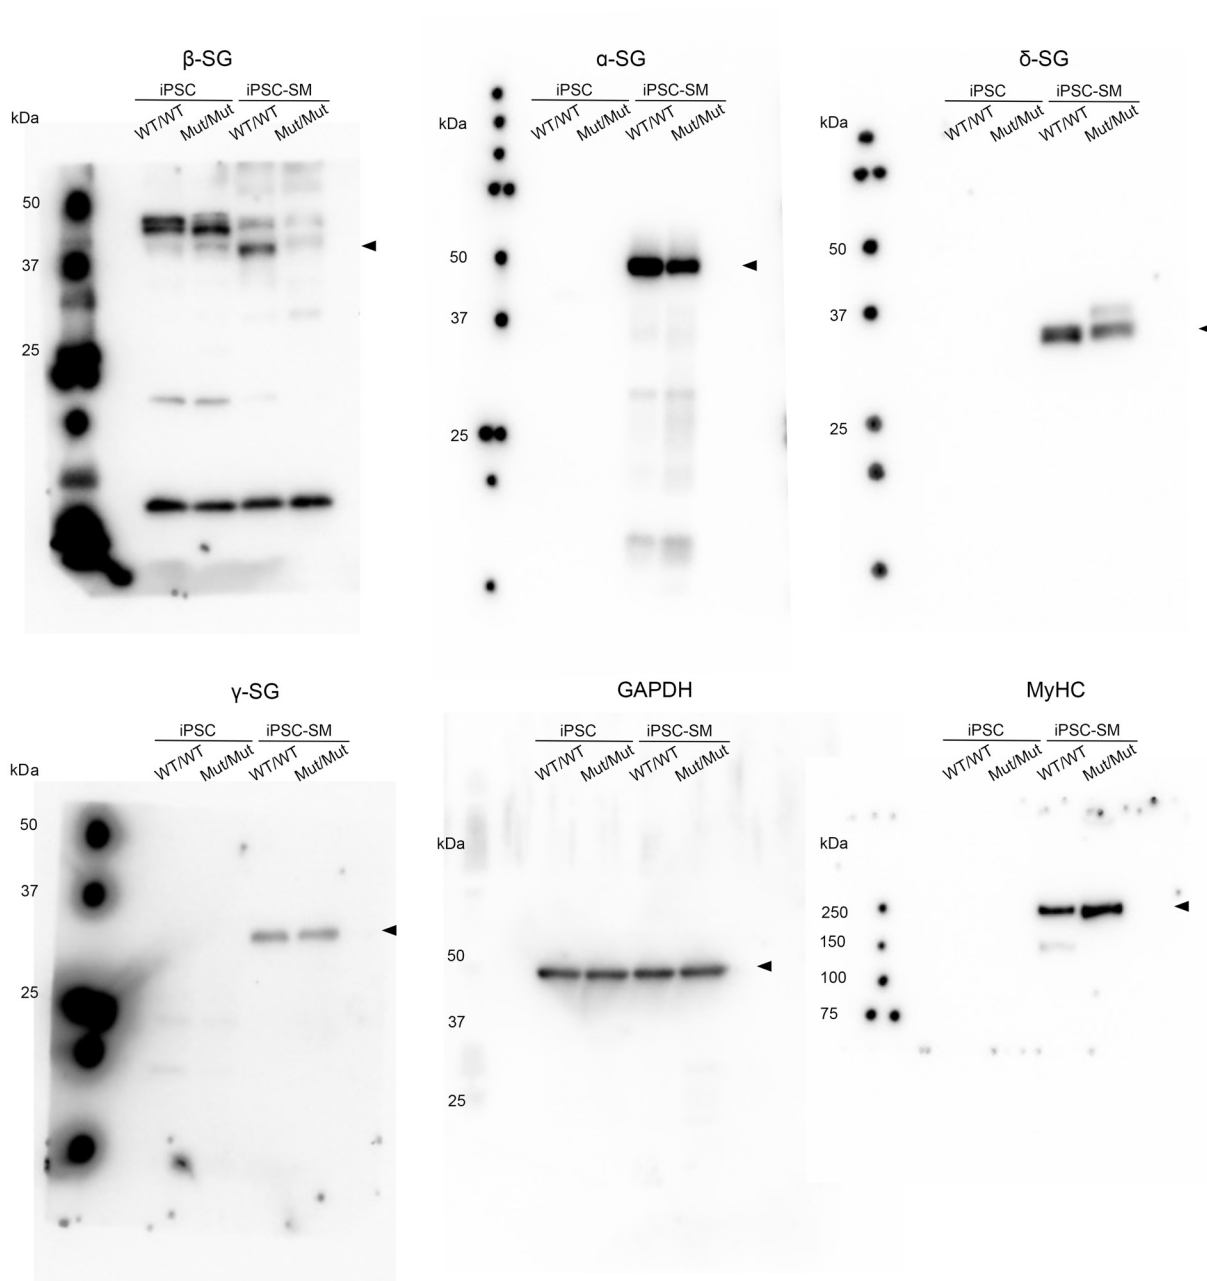

Full unedited blot gel for Figure [S3]

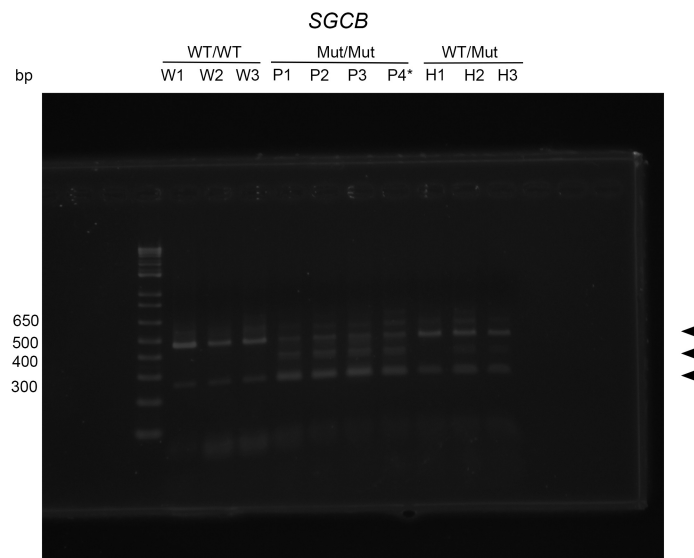

Full unedited blot gel for Supplemental Figure [S8A]

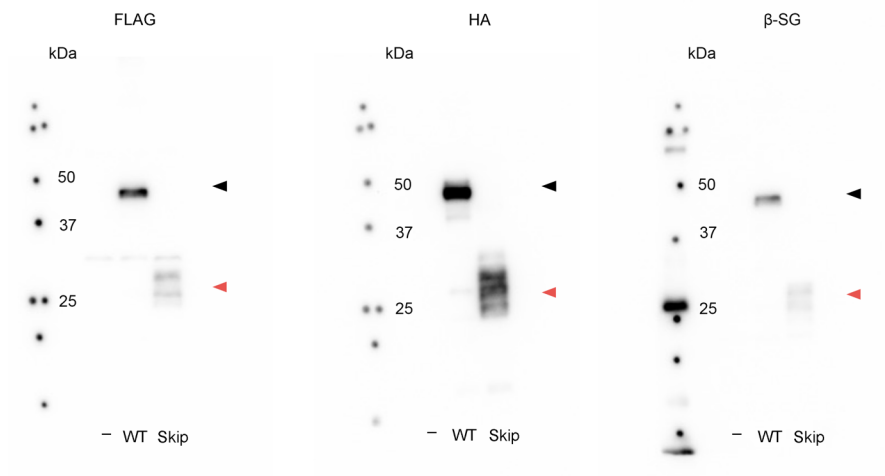

Full unedited blot gel for Supplemental Figure [S8C]

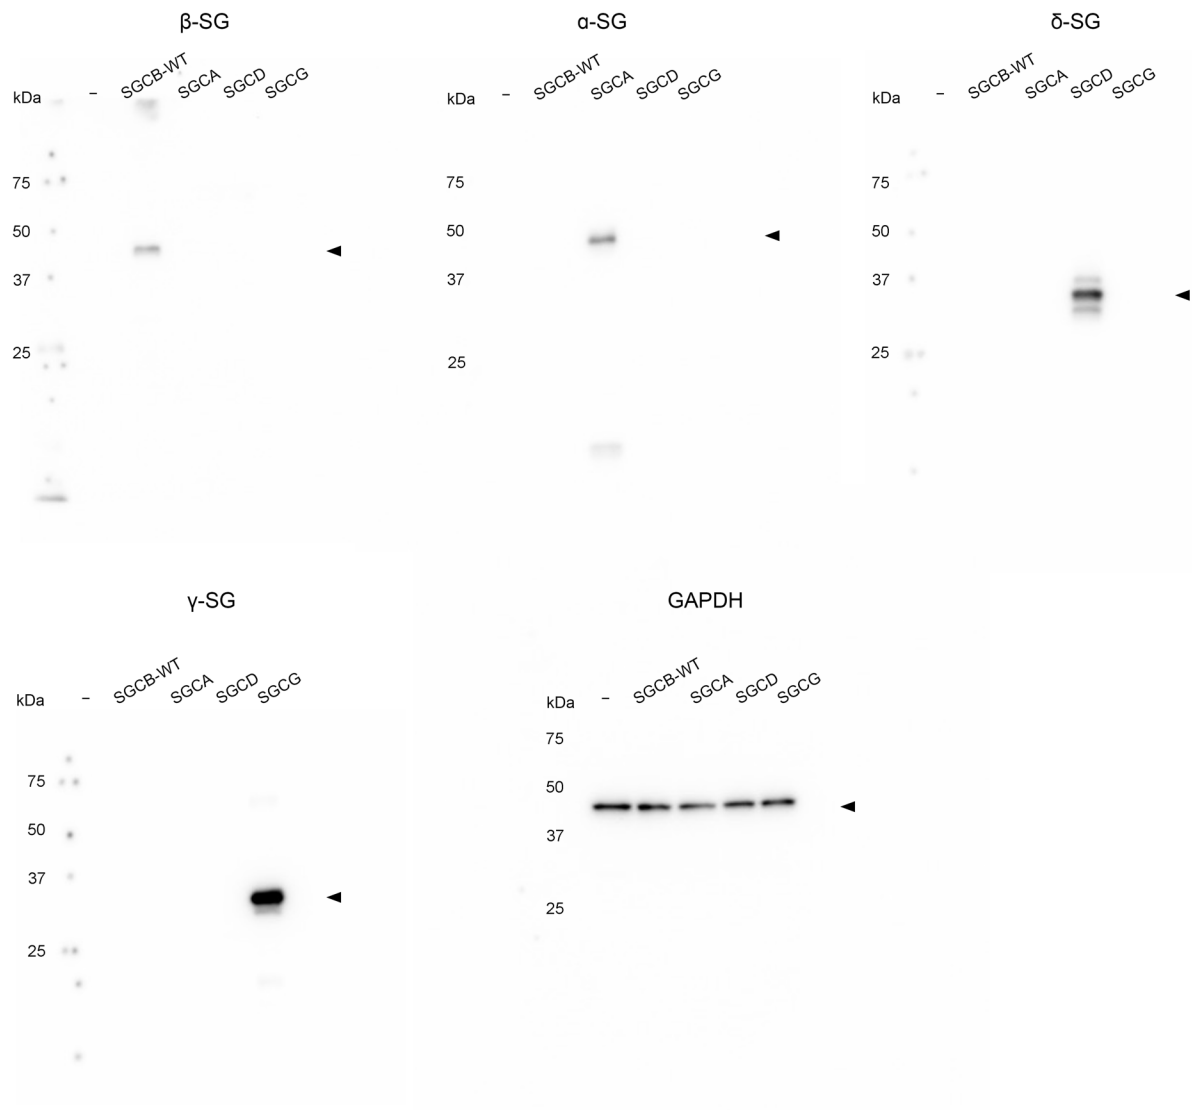

Full unedited blot gel for Figure [S13A]

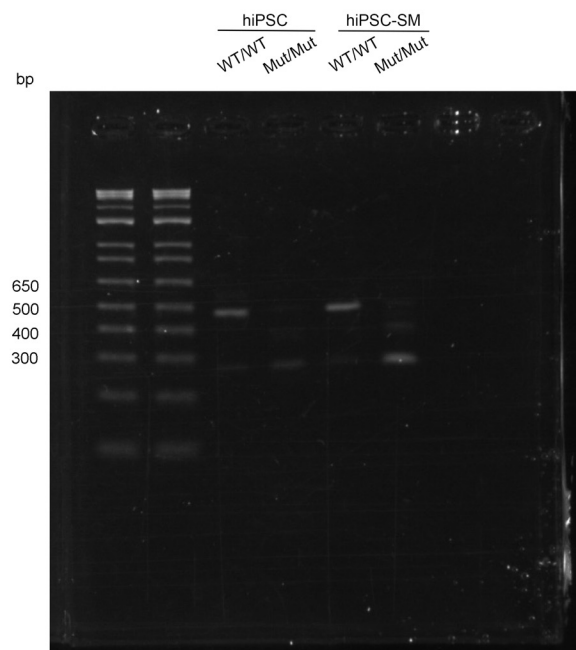

Full unedited blot gel for Figure [S13C]

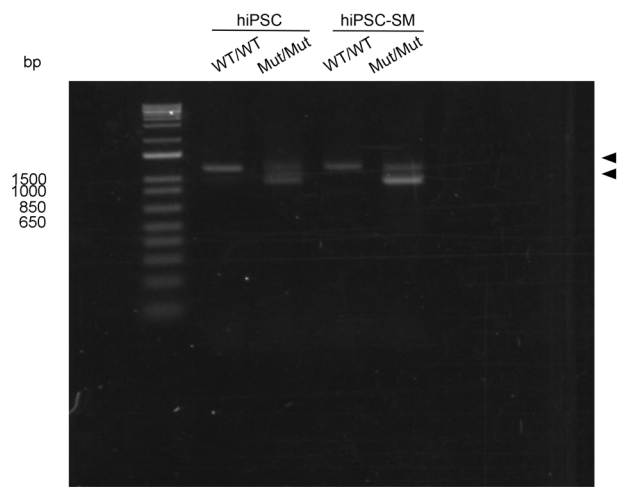

Supplement: sd2 [file 2]
